# Supplementary material
Source: PubMed Central journal article supplement (PMC8055244)
Supplement: NIHMS1585320-supplement-supp_info.pdf [file NIHMS1585320-supplement-supp_info.pdf]

**Supplementary Table 1a. Association of 5% weight loss at 72 weeks with change in histologic outcomes**

| Histologic Outcome<br>(1+ score/stage decrease) | Weight Loss at 72 weeks |               | ≥5% vs <5% Weight Loss at 72 weeks |           |         |
|-------------------------------------------------|-------------------------|---------------|------------------------------------|-----------|---------|
|                                                 | ≥5%<br>(n=14)           | <5%<br>(n=64) | Odds<br>Ratio                      | 95% CI    | P-value |
| Steatosis                                       | 64%                     | 38%           | 3.0                                | 0.9, 10.0 | 0.07    |
| Lobular Inflammation                            | 43%                     | 45%           | 0.9                                | 0.3, 2.9  | 0.87    |
| Portal inflammation                             | 29%                     | 9%            | 3.9                                | 0.9, 16.2 | 0.06    |
| Ballooning                                      | 50%                     | 28%           | 2.6                                | 0.8, 8.3  | 0.12    |
| Fibrosis                                        | 29%                     | 17%           | 1.9                                | 0.5, 7.3  | 0.33    |
|                                                 |                         |               |                                    |           |         |
| Histologic improvement*                         | 43%                     | 23%           | 2.4                                | 0.7, 8.2  | 0.14    |
| Resolution of NASH                              | 14%                     | 12%           | 1.2                                | 0.2, 6.2  | 0.86    |

\*Decrease in NAFLD Activity Score (NAS) of at least 2 points and no worsening of fibrosis

**Supplementary Table 1b. Association of decrease of 17 U/L in ALT at 72 weeks with change in histologic outcomes**

| Histologic Outcome<br>(1+ score/stage decrease) | ALT decrease at 72 weeks |                   | ≥17 vs <17 U/L decrease in ALT at 72 weeks |          |         |
|-------------------------------------------------|--------------------------|-------------------|--------------------------------------------|----------|---------|
|                                                 | ≥17 U/L<br>(n=35)        | <17 U/L<br>(n=43) | Odds<br>Ratio                              | 95% CI   | P-value |
| Steatosis                                       | 57%                      | 30%               | 3.1                                        | 1.2, 7.8 | 0.02    |
| Lobular Inflammation                            | 54%                      | 37%               | 2.0                                        | 0.8, 5.0 | 0.13    |
| Portal inflammation                             | 11%                      | 14%               | 0.8                                        | 0.2, 3.1 | 0.74    |
| Ballooning                                      | 46%                      | 21%               | 3.2                                        | 1.2, 8.6 | 0.02    |
| Fibrosis                                        | 23%                      | 16%               | 1.5                                        | 0.5, 4.7 | 0.46    |
|                                                 |                          |                   |                                            |          |         |
| Histologic improvement*                         | 37%                      | 19%               | 2.6                                        | 0.9, 7.2 | 0.07    |
| Resolution of NASH                              | 9%                       | 16%               | 0.5                                        | 0.1, 2.0 | 0.32    |

\*Decrease in NAFLD Activity Score (NAS) of at least 2 points and no worsening of fibrosis
